# Supplementary material for: Hydrophilic interior between hydrophobic regions in inverse bilayer structures of cation–1,1′-binaphthalene-2,2′-diyl phosphate salts
Source: Royal Society of Chemistry journal article supplement (doi:10.1039/b510617f), 2005-12-15
Supplement: b510617f.pdf [file b510617f.pdf]

## Supplementary Material for: Hydrophilic interior between hydrophobic regions in inverse bilayer structures of cation–1,1'-binaphthalene-2,2'-diyl phosphate salts

Thomas Dorn, Anne-Christine Chamayou and Christoph Janiak \*

Institut für Anorganische und Analytische Chemie, Universität Freiburg, Albertstr. 21, D-79104 Freiburg, Germany. E-mail: [janiak@uni-freiburg.de](mailto:janiak@uni-freiburg.de); Fax: 49 761 2036147; Tel: 49 761 2036127

This supplementary material contains the annotated pictures for the hydrogen-bonding interactions found in the crystal structures of the complexes (1,1'-binaphthalene-2,2'-diyl phosphate = BNPPA<sup>-</sup>):

- 1 (Isonicotin-1-ium amide)-(rac-1,1'-binaphthalene-2,2'-diyl phosphate)-monohydrate, (C<sub>6</sub>H<sub>7</sub>N<sub>2</sub>O)(C<sub>20</sub>H<sub>12</sub>PO<sub>4</sub>)·H<sub>2</sub>O
- 2 (Isonicotin-1-ium acid)-(R-1,1'-binaphthalene-2,2'-diyl phosphate), (C<sub>6</sub>H<sub>6</sub>NO<sub>2</sub>)(C<sub>20</sub>H<sub>12</sub>PO<sub>4</sub>)
- 3 (Guanidinium)-(rac-1,1'-binaphthalene-2,2'-diyl phosphate)-dihydrate·semimethanol, (CH<sub>6</sub>N<sub>3</sub>)(C<sub>20</sub>H<sub>12</sub>PO<sub>4</sub>)·2H<sub>2</sub>O·0.5CH<sub>3</sub>OH
- 4 *trans*-[Tetraammin-di(methanol~0.75/aqua~0.25)-copper(II)]-bis(rac-1,1'-binaphthalene-2,2'-diylphosphate)-dihydrate·monomethanol
- 5 *trans*-(Diaqua-tetramethanol-copper(II))-bis(rac-1,1'-binaphthalene-2,2'-diylphosphate)·hydrate·dimethanol
- 6 *cis*-[Diaqua-bis(ethylene diamine)-nickel(II)]-bis(rac-1,1'-binaphthalene-2,2'-diylphosphate)-dihydrate·dimethanol

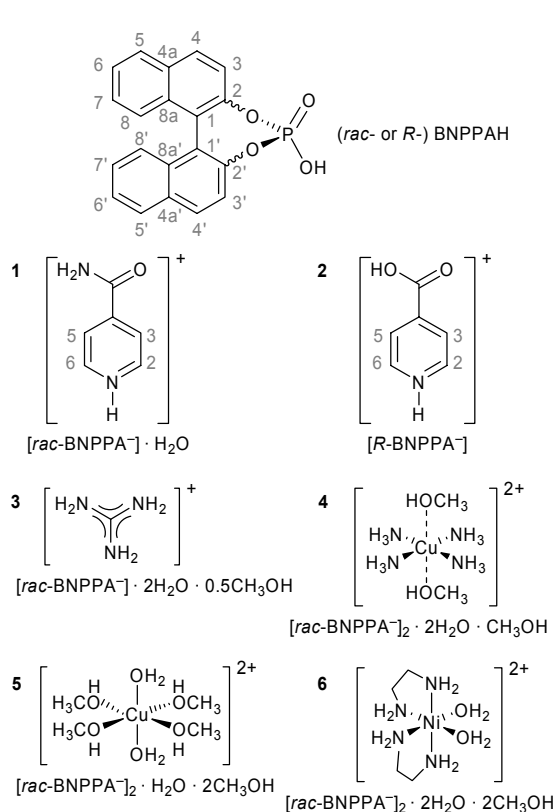

**Scheme 1** Molecular composition of the prepared 1,1'-binaphthalene-2,2'-diyl phosphate (BNPPA) salts **1-6** with the nomenclature numbering scheme.

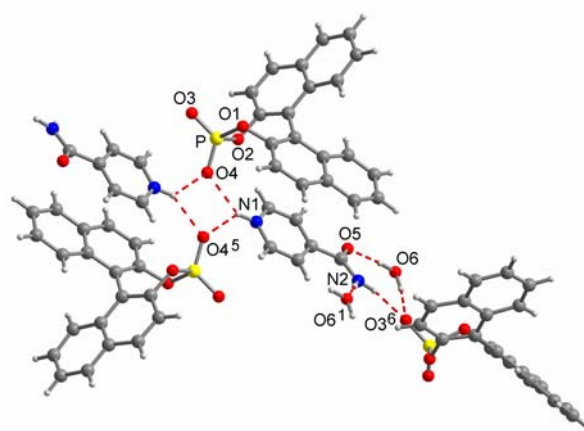

**Fig. 1** Hydrogen bonding scheme in **1** (see Table 1 in paper for details).

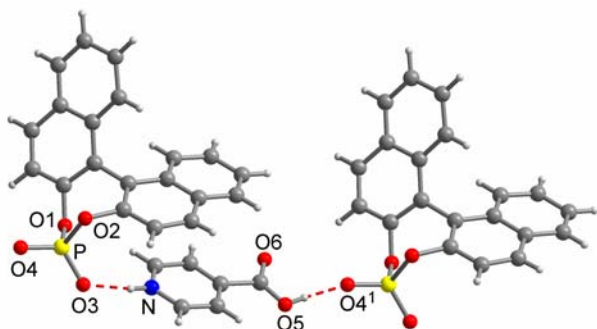

Fig. 2 Hydrogen bonding scheme in 2 (see Table 1 in paper for details).

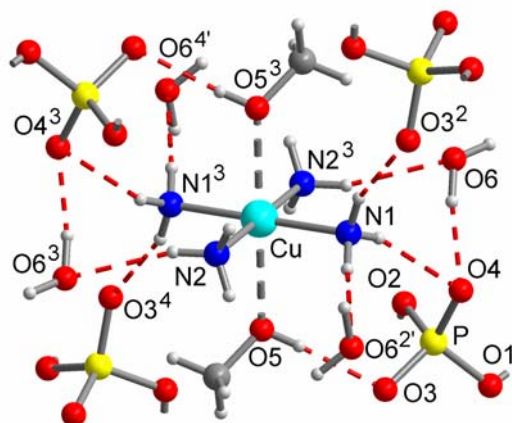

Fig. 4a Hydrogen bonding scheme around the complex  $trans-[Cu(NH_3)_4(CH_3OH)_2]^{2+}$  in 4 (see Table 3 in paper for details). Additional symmetry transformation:  $4 = x, 1/2-y, 1/2+z$ ;  $4' = x, 3/2-y, 1/2+z$ .

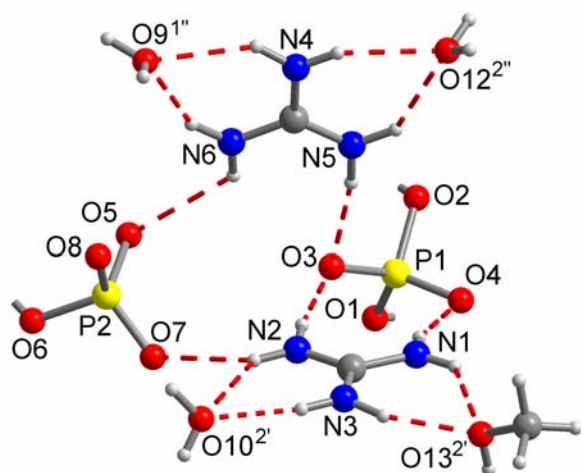

Fig. 3a Hydrogen bonding scheme around the guanidinium cation in 3 (see Table 2 in paper for details).

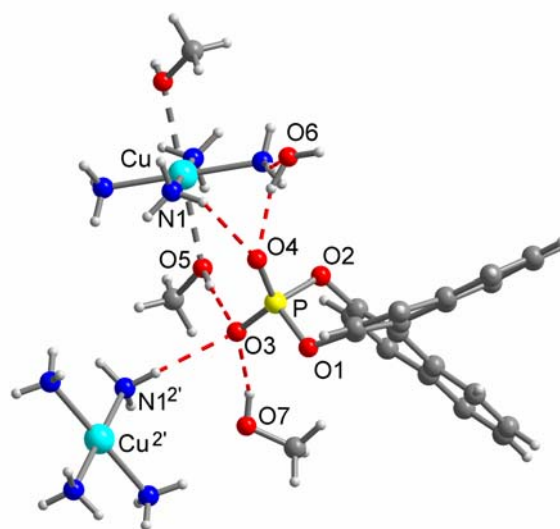

Fig. 4b Hydrogen bonding scheme around the phosphate head group of BNPPA in 4 (see Table 3 in paper for details). Additional symmetry transformation:  $4 = x, 1/2-y, 1/2+z$ .

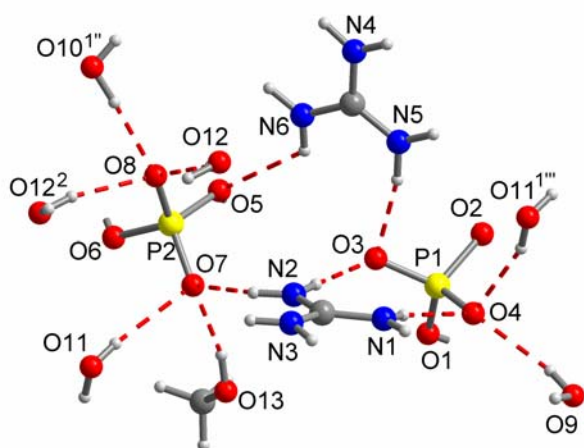

Fig. 3b Hydrogen bonding scheme around the phosphate head group of BNPPA in 3 (see Table 2 in paper for details). Additional symmetry transformation:  $1''' = -1+x, y, z$ .

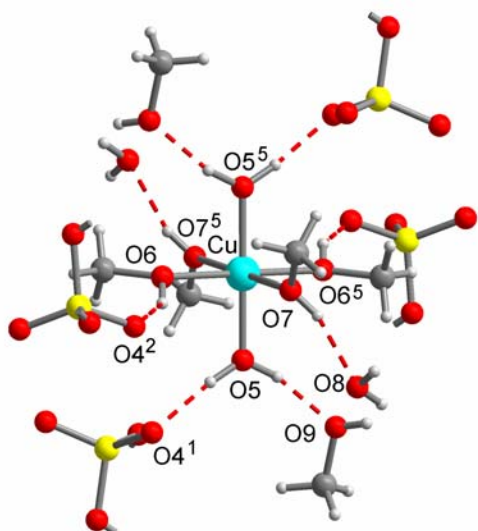

**Fig. 5a** Hydrogen bonding scheme around the complex *trans*-[Cu(H<sub>2</sub>O)<sub>2</sub>(CH<sub>3</sub>OH)<sub>4</sub>]<sup>2+</sup> in **5** (see Table 3 in paper for details). Additional symmetry transformation: 5 = -x, -y, -z

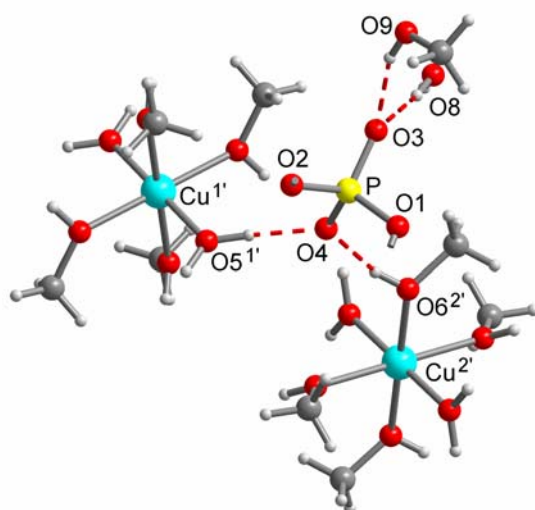

**Fig. 5b** Hydrogen bonding scheme around the phosphate head group of BNPPA in **5** (see Table 3 in paper for details). Additional symmetry transformations: 1' = x, 1+y, z; 2' = -x, 1+y, 1/2-z.

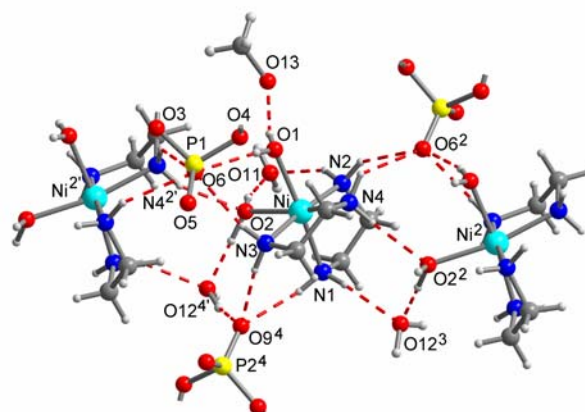

**Fig. 6a** Hydrogen bonding scheme around the complex *cis*-[Ni(en)<sub>2</sub>(H<sub>2</sub>O)<sub>2</sub>]<sup>2+</sup> in **6** (see Table 4 in paper for details). Additional symmetry transformation: 2' = x, 1-y, 1/2+z.

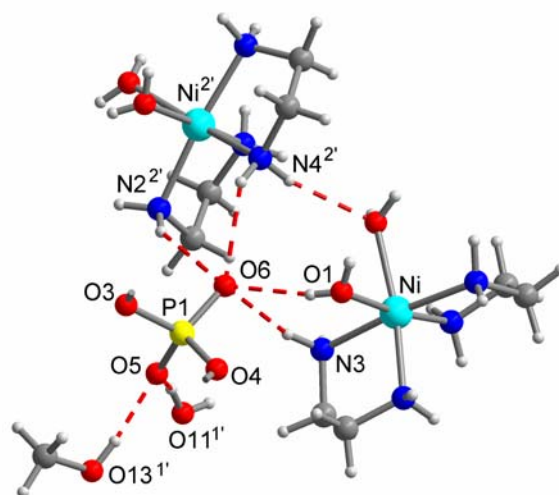

**Fig. 6b** Hydrogen bonding scheme around the phosphate head group with P1 of BNPPA in **6** (see Table 4 in paper for details). Additional symmetry transformations: 1' = x, -1+y, z; 2' = x, 1-y, 1/2+z.

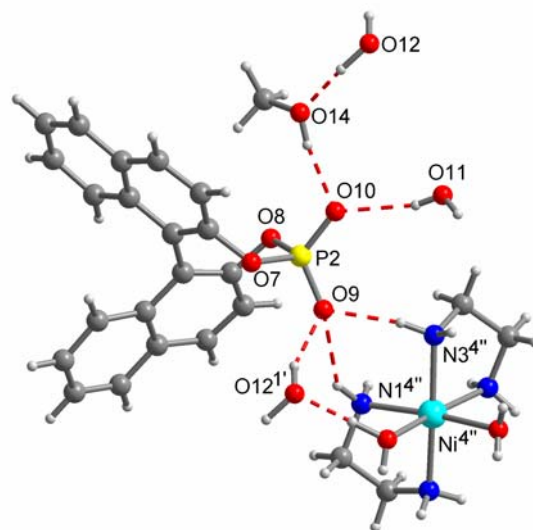

**Fig. 6c** Hydrogen bonding scheme around the phosphate head group with P2 of BNPPA in **6** (see Table 4 in paper for details). Additional symmetry transformations: 1' = x, -1+y, z; 4'' = 1/2+x, 1/2-y, 1/2+z.
